# Supplementary material
Source: PubMed Central journal article supplement (PMC4150128)
Supplement: supp_WNL.0000000000000721_Table_e-1.pdf [file supp_WNL.0000000000000721_Table_e-1.pdf]

**Table e 1. Nonparametric Univariate Correlations Between Cognitive Function and Extracted CBF Values Derived from the Striatal Areas of Decreased Perfusion in the Mutation Carriers compared to Non-Carriers (n=14)**

|                    | Cognitive Domain |                |                  |                   |               |              |              |      |       |           |           |       |                  |                  |        |
|--------------------|------------------|----------------|------------------|-------------------|---------------|--------------|--------------|------|-------|-----------|-----------|-------|------------------|------------------|--------|
|                    | Language         |                |                  | Visuoconstruction |               |              | Executive    |      |       |           |           |       | Memory           |                  | Global |
| <b>CBF Cluster</b> | Boston Naming    | Letter fluency | Category fluency | Figure copy       | Figure recall | Block design | DIGIT Symbol | DSF  | DSB   | TRAIL S A | TRAIL S B | SCW   | Word list recall | Paragraph Recall | MMSE   |
| right striatum     | -.31             | -.19           | -.11             | -.11              | -.26          | .01          | -.42*        | -.14 | -.10  | .31       | .15       | -.46* | -.28             | -.05             | -.25   |
| left striatum      | -.33             | -.40*          | -.17             | .00               | -.42*         | -.12         | -.06         | -.14 | -.52* | .18       | .15       | -.35  | -.06             | -.02             | -.02   |

\*. Correlation is significant at the 0.05 level (2-tailed); \*\*. Correlation is significant at the 0.01 level (2-tailed). DSB-digit span backward; DSF-digit span forward; SCW-Stroop color-word.
